# Supplementary material
Source: PubMed Central journal article supplement (PMC5603718)
Supplement: NIHMS899787-supplement-Supplementary_Figure_2.pdf [file NIHMS899787-supplement-Supplementary_Figure_2.pdf]

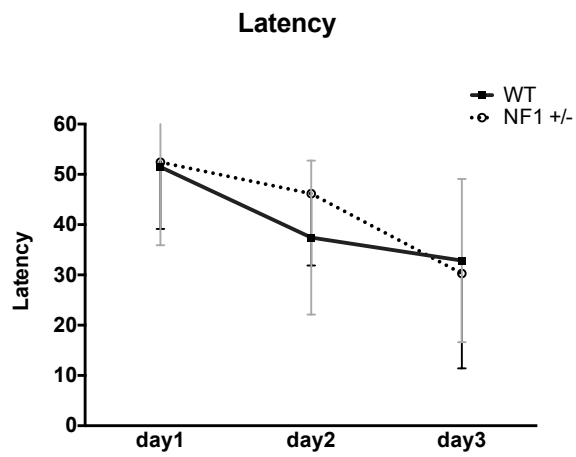

Supplementary Figure 2: Latency to the platform in Nf1<sup>+/-</sup> and WT mice in the hidden-platform version of the water maze, two-way ANOVA,  $p=0.39$ ,  $F(2, 52)=0.959$ .
