# Supplementary material
Source: PubMed Central journal article supplement (PMC5603718)
Supplement: NIHMS899787-supplement-Supplementary_Figure_3.pdf [file NIHMS899787-supplement-Supplementary_Figure_3.pdf]

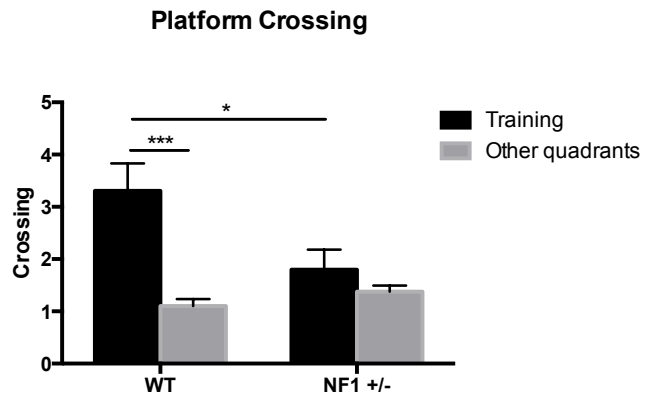

Supplementary Figure 3: number of platform crossings during a 60s probe trial given after 3 days of training, two-way ANOVA,  $p=0.0156$ ,  $F(1,26)=6.693$ ; Multiple comparisons: (WT,  $n=13$ ,  $p=0.0004$ ;  $Nf1^{+/-}$ ,  $n=15$ ,  $p=0.6117$ ).
