# Supplementary material
Source: PubMed Central journal article supplement (PMC5603718)
Supplement: NIHMS899787-supplement-Supplementary_Figure_4.pdf [file NIHMS899787-supplement-Supplementary_Figure_4.pdf]

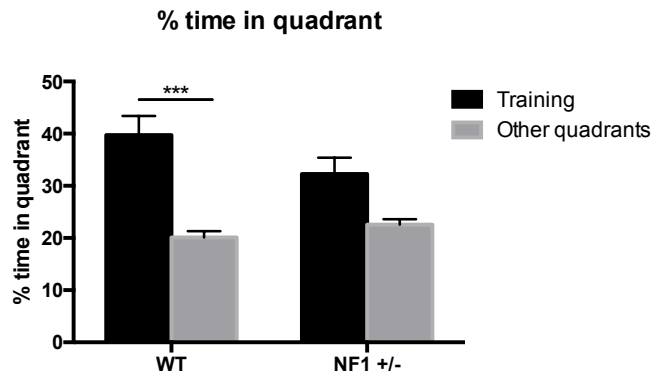

Supplementary Figure 4: percentage time spent in quadrant during a 60s probe trial given after 3 days of training, two-way ANOVA,  $p=0.1317$ ,  $F(1,26)=2.422$ ; Multiple comparisons: (WT,  $n=13$ ,  $p=0.0006$ ; Nf1<sup>+/-</sup>,  $n=15$ ,  $p=0.0683$ ).
