# Supplementary material
Source: PubMed Central journal article supplement (PMC5603718)
Supplement: NIHMS899787-supplement-Supplementary_Table_1.pdf [file NIHMS899787-supplement-Supplementary_Table_1.pdf]

Supplementary Table 1: Results from ANOVA test on evaluating sex x genotype interaction.

|             | WT vs. Nf1 |       | Males vs. Females |      | Sex x Genotype |      |
|-------------|------------|-------|-------------------|------|----------------|------|
|             | p_value    | F     | p_value           | F    | p_value        | F    |
| PFC         | 0.0167     | 6.88  | 0.5359            | 0.4  | 0.1863         | 1.88 |
| CPu         | 0.0007     | 16.3  | 0.3028            | 1.12 | 0.9829         | 0    |
| Hippocampus | 0.0001     | 23.97 | 0.1286            | 2.52 | 0.1678         | 2.06 |
