# Supplementary material
Source: PubMed Central journal article supplement (PMC5603718)

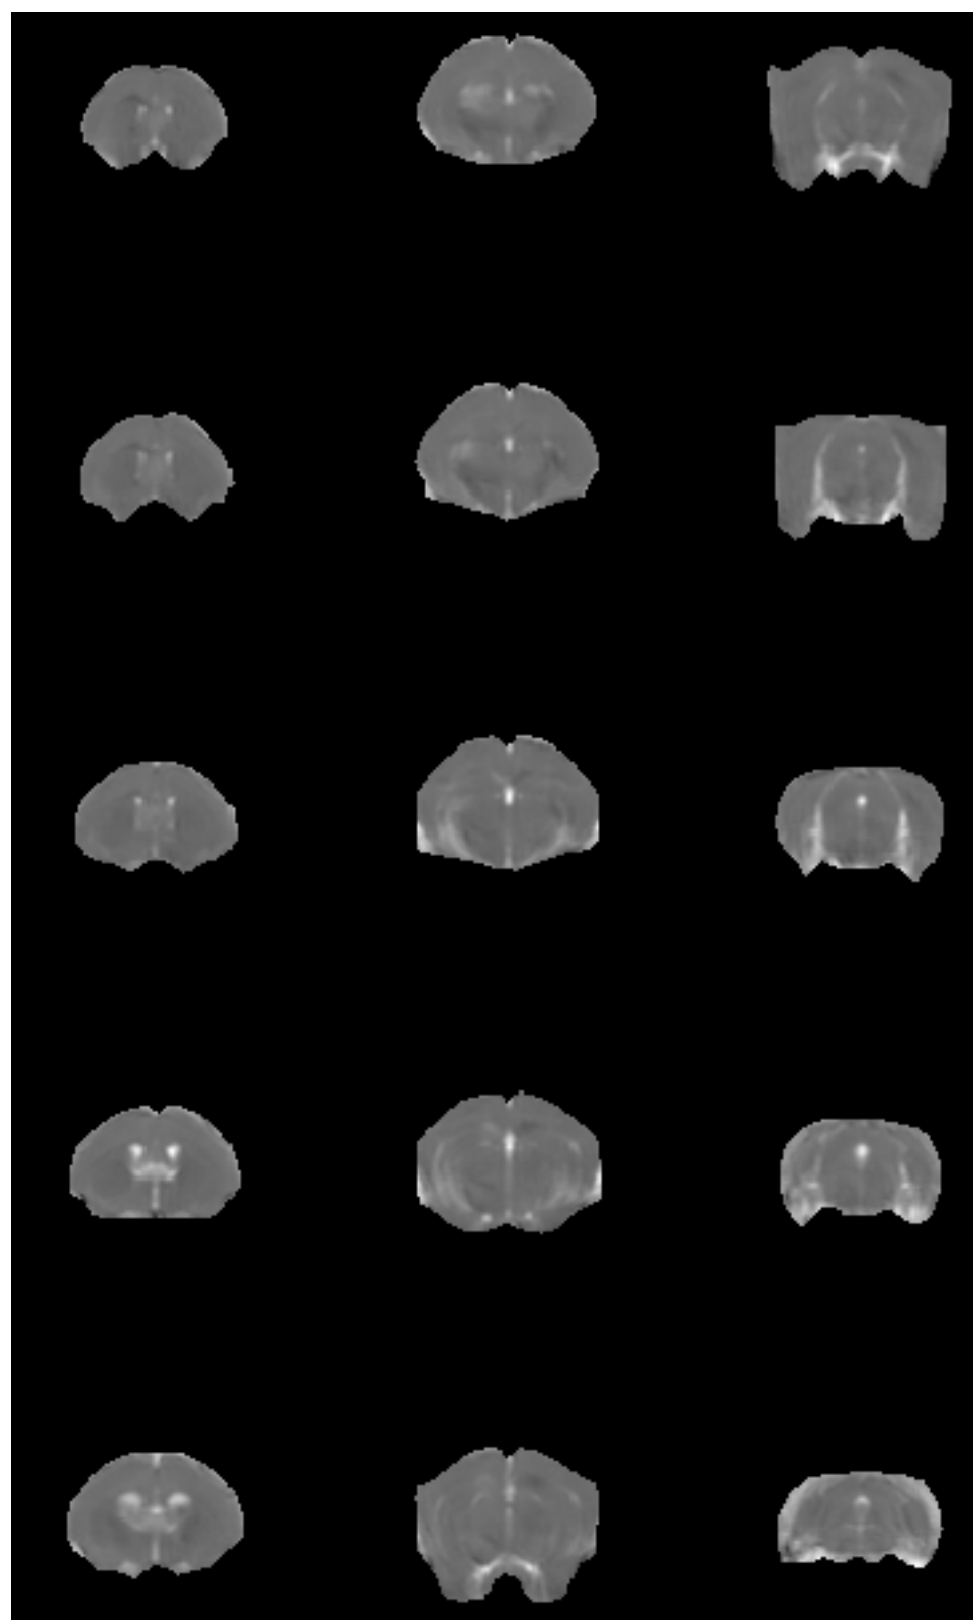

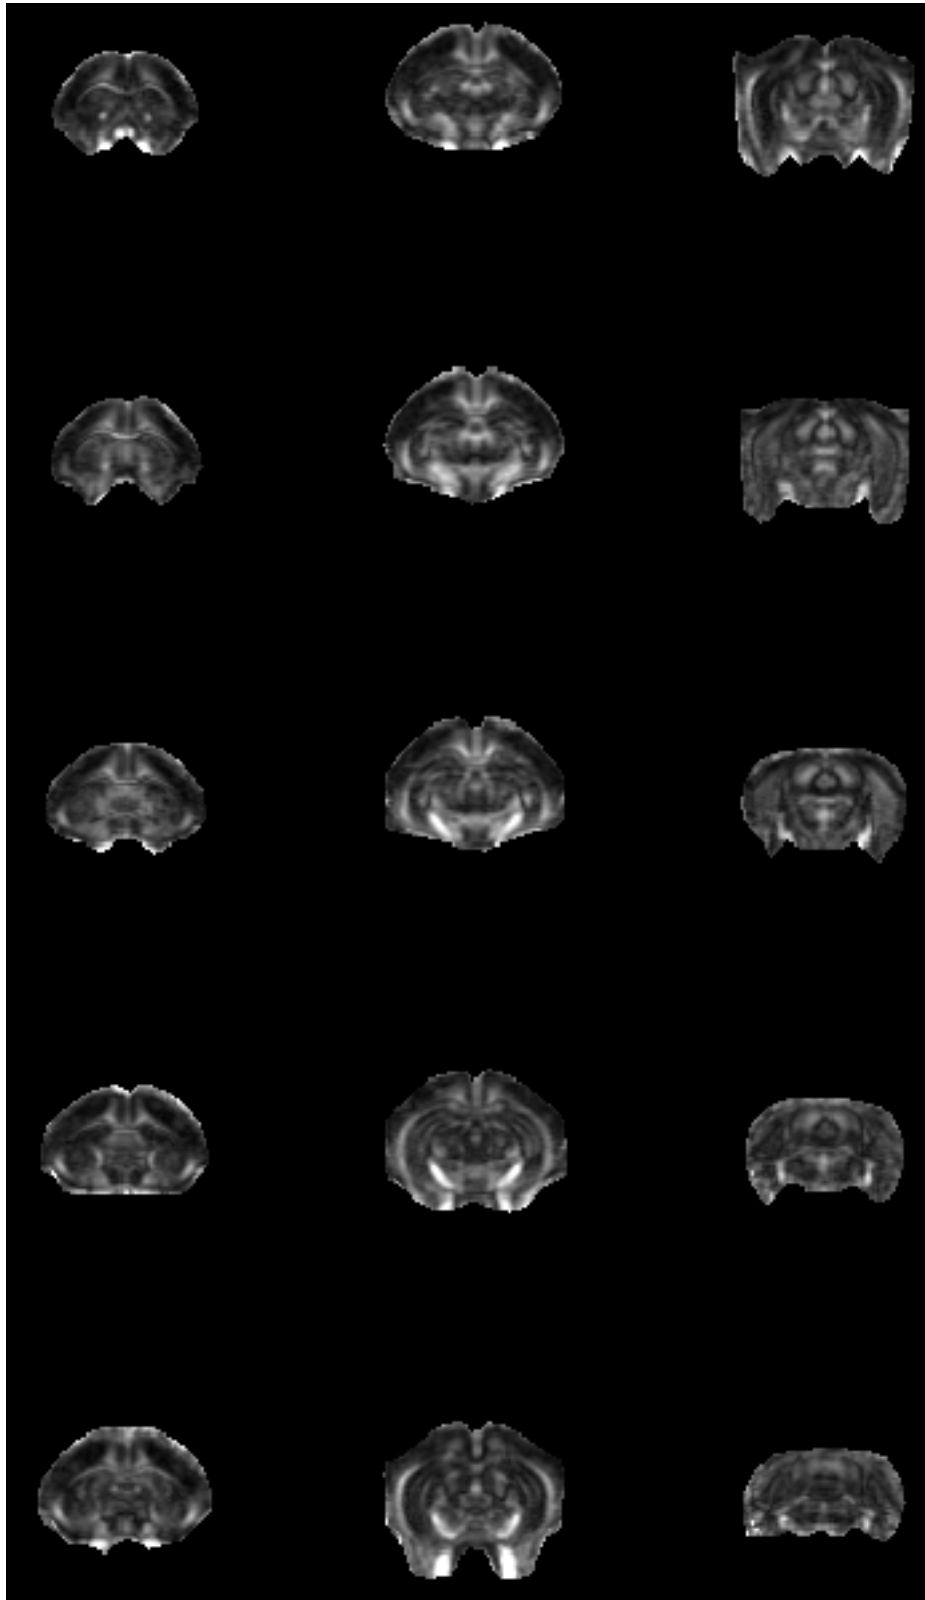

Supplementary Figure 1: Example of MD and FA maps.

Supplement: NIHMS899787-supplement-Supplementary_Figure_1.pdf [file NIHMS899787-supplement-Supplementary_Figure_1.pdf]
